# Supplementary material for: Increased nitrate intake from beetroot juice over 4 weeks affects nitrate metabolism, but not vascular function or blood pressure in older adults with hypertension
Source: Royal Society of Chemistry journal article supplement (doi:10.1039/d3fo03749e), 2024-01-01

## Acetylcholine [nmol\*1/min]

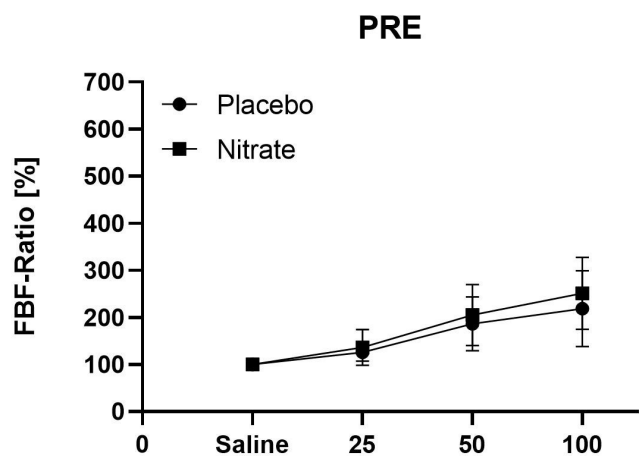

## Glyceroltrinitrate [nmol\*1/min]

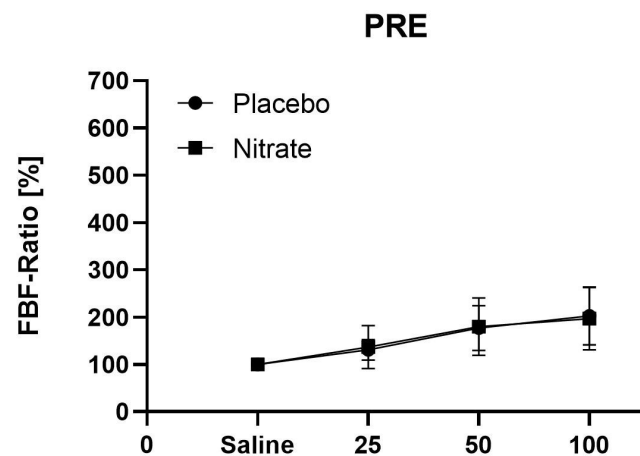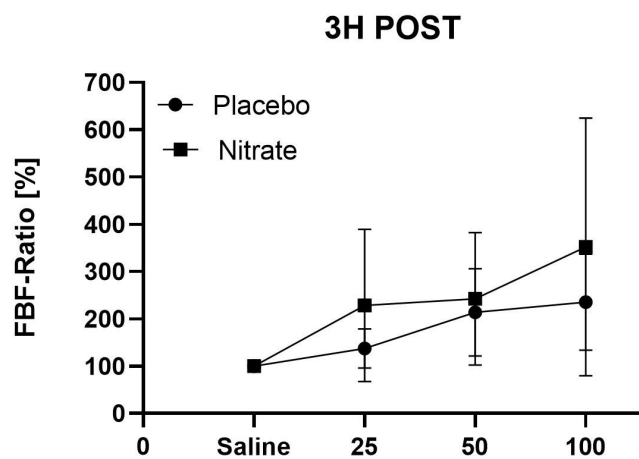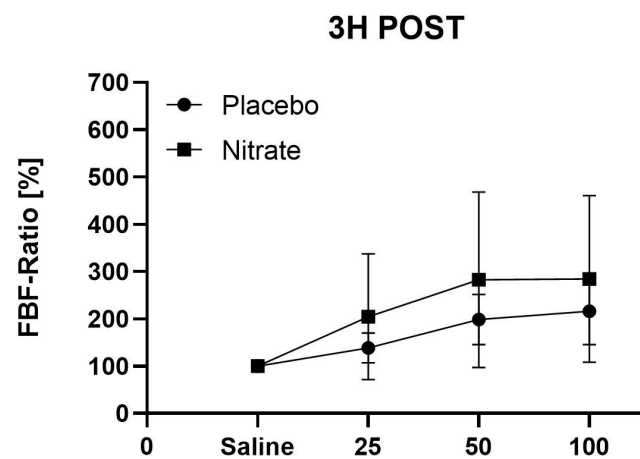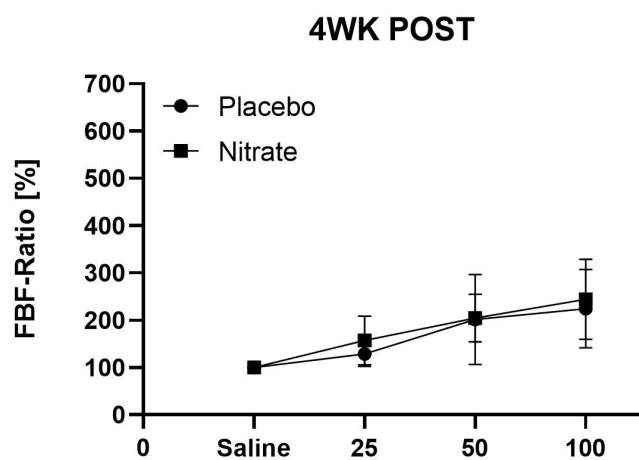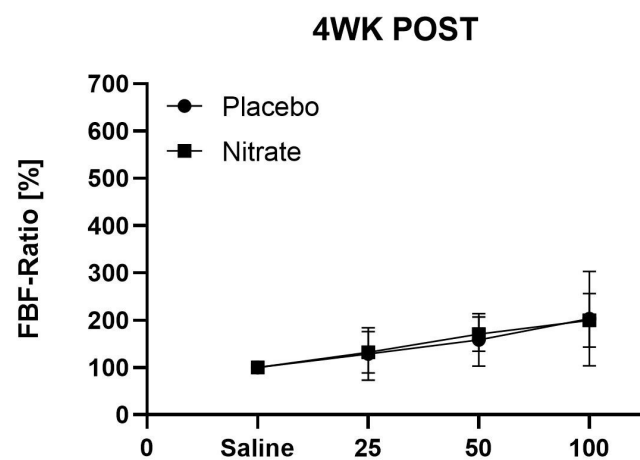

Supplement: d3fo03749e2.pdf [file d3fo03749e2.pdf]
