# Supplementary material for: Increased nitrate intake from beetroot juice over 4 weeks affects nitrate metabolism, but not vascular function or blood pressure in older adults with hypertension
Source: Royal Society of Chemistry journal article supplement (doi:10.1039/d3fo03749e), 2024-01-01
Supplement: d3fo03749e3.pdf [file d3fo03749e3.pdf]

**Supplemental Table 1.** Absolute forearm blood flow (FBF) ( $\text{ml}\cdot\text{min}^{-1}\cdot 100\text{ ml}^{-1}$ ) of the interventional- and control arm during intra-arterial saline infusion before (PRE), and 3 hours (3H POST) and 4 weeks (4WK POST) after the interventions with nitrate-rich (Nitrate) or nitrate-depleted (Placebo) beetroot juice.

| <b>Nitrate</b> |                                           |             |                                                |             |
|----------------|-------------------------------------------|-------------|------------------------------------------------|-------------|
|                | Basal FBF prior to acetylcholine infusion |             | Basal FBF prior to glyceryltrinitrate infusion |             |
|                | Interventional arm                        | Control arm | Interventional arm                             | Control arm |
| PRE            | 5.7 ± 1.1                                 | 6.1 ± 1.2   | 5.6 ± 1.4                                      | 5.8 ± 1.9   |
| 3H POST        | 4.4 ± 1.2                                 | 4.9 ± 1.1   | 4.3 ± 1.2                                      | 4.6 ± 1.0   |
| 4WK POST       | 6.1 ± 1.0                                 | 7.3 ± 1.7   | 5.5 ± 1.1                                      | 5.9 ± 1.6   |
| <b>Placebo</b> |                                           |             |                                                |             |
|                | Basal FBF prior to acetylcholine infusion |             | Basal FBF prior to glyceryltrinitrate infusion |             |
|                | Interventional arm                        | Control arm | Interventional arm                             | Control arm |
| PRE            | 5.9 ± 1.1                                 | 6.3 ± 1.3   | 5.7 ± 1.2                                      | 6.3 ± 1.3   |
| 3H POST        | 5.1 ± 0.9                                 | 5.6 ± 1.1   | 5.1 ± 1.2                                      | 5.4 ± 1.0   |
| 4WK POST       | 5.9 ± 1.2                                 | 7.2 ± 1.9   | 5.8 ± 1.1                                      | 6.9 ± 2.3   |

Values are mean ± 95% confidence interval. Data were compared using a repeated-measures linear mixed-model.
